# Supplementary material
Source: Springer Nature journal article supplement (https://www.springermedizin.de/resource/supplementary/13690_2013_55_MOESM2_ESM.pdf/9422488)
Supplement: MOESM2 [file 9422488]

## Primary and Secondary Reasons for Non-vaccination

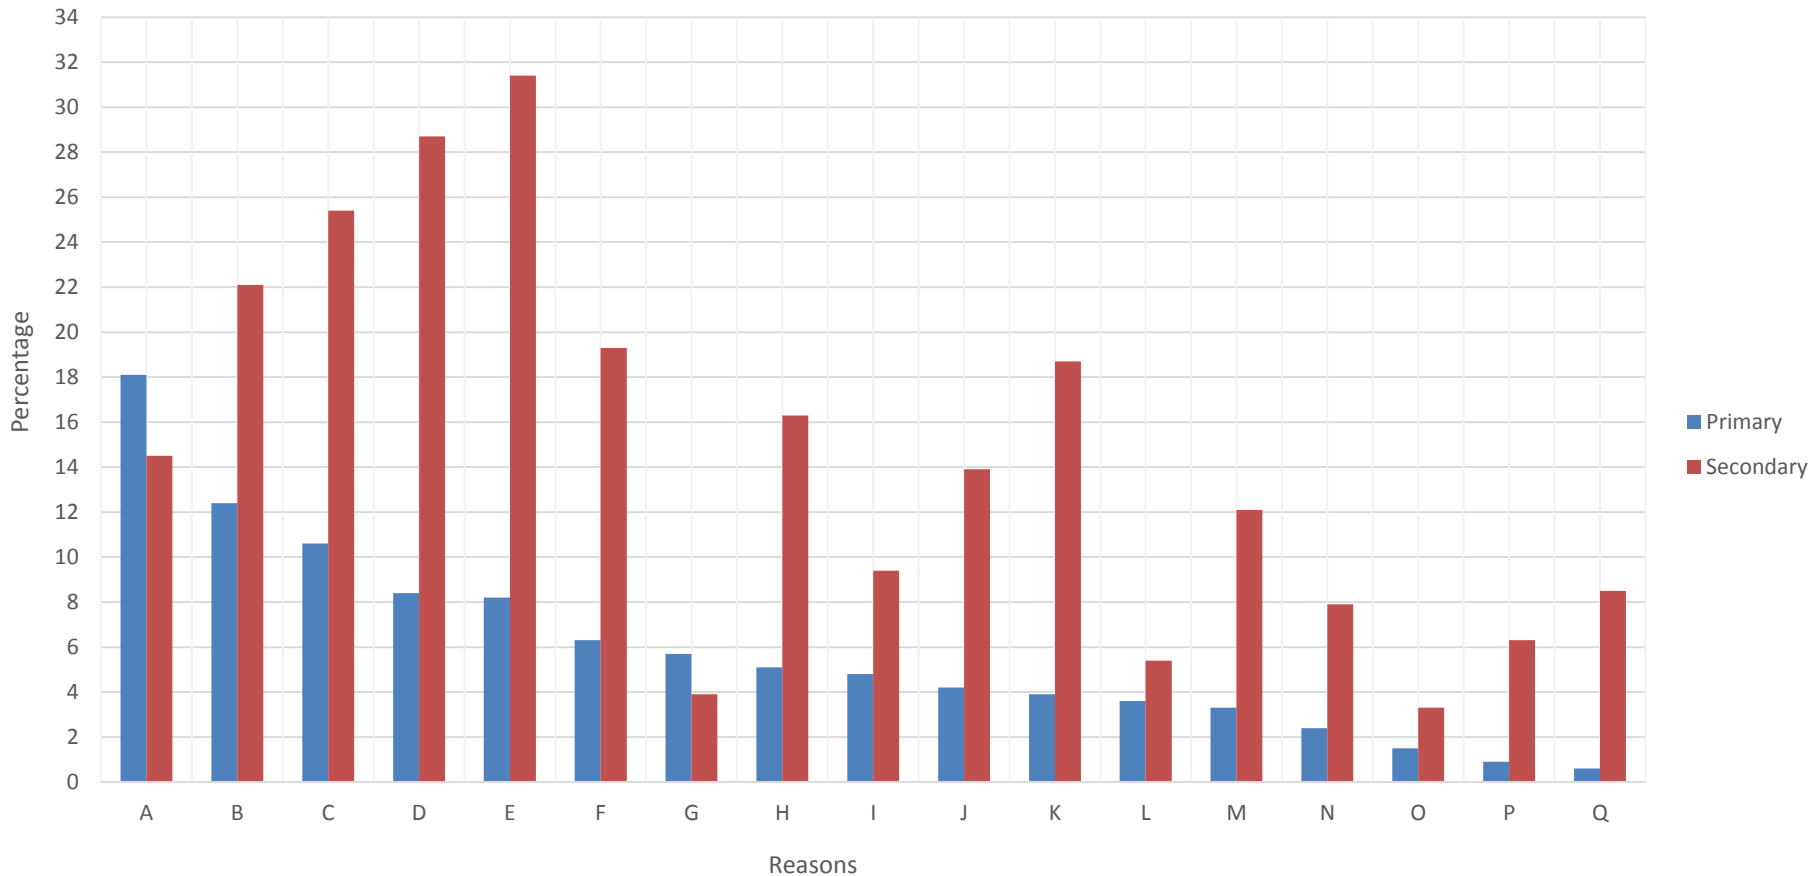

| Key                                     |                                            |                                              |
|-----------------------------------------|--------------------------------------------|----------------------------------------------|
| A = lack of knowledge                   | G = missed opportunities                   | M = vaccination not considered effective     |
| B = lack of time due to busy schedule   | H = fear of side effects                   | N = poor previous experience with physicians |
| C = non-compliant spouse                | I = accessibility problems                 | O = VPDs not considered severe               |
| D = security conditions                 | J = financial problems                     | P = fear of exposing child to needles        |
| E = religious taboos                    | K = vaccination not deemed necessary       | Q = being single parent                      |
| F = lack of trust on medical facilities | L = physician advising against vaccination |                                              |
